# Supplementary material for: A Prospective Birth Cohort Study on Maternal Cholesterol Levels and Offspring Attention Deficit Hyperactivity Disorder: New Insight on Sex Differences
Source: MDPI journal article supplement (doi:10.3390/brainsci8010003), 2017-12-23
Supplement: s1 [file s1]

# A Prospective Birth Cohort Study on Maternal Cholesterol Levels and Offspring Attention Deficit Hyperactivity Disorder: New Insight on Sex Differences: Supplementary Materials

Table S1. ICD-9 and ICD-10 codes for the diagnosis of each neurodevelopmental disorder.

| Neurodevelopmental disorder | ICD-9 codes                                                         | ICD-10 codes                                                                                                          |
|-----------------------------|---------------------------------------------------------------------|-----------------------------------------------------------------------------------------------------------------------|
| ASD                         | 299.0, 299.00, 299.01, 299.8, 299.80, 299.81, 299.9, 299.90, 299.91 | F84.0, F84.8, F84.9                                                                                                   |
| ADHD                        | 314.0, 314.00, 314.01, 314.1, 314.2, 314.8, 314.9                   | F90, F90.0, F90.1, F90.2, F90.8, F90.9                                                                                |
| Disturbance of conduct      | 312.0–312.9                                                         | F91, F91.0, F91.2, F91.3, F91.8, F91.9                                                                                |
| Delays in development       | 315.0–315.9                                                         | F81.0, R48.0, F81.81, F81.2, F81.89, F80.1, F80.2, H93.25, F80.4, F80.81, F80.0, F80.82, F80.89, F82, F88, F81.9, F89 |
| Intellectual disabilities   | 317-317                                                             | F70, F71, F72, F73, F78, F79                                                                                          |
| Failure to thrive           | 783.4, 783.40, 783.41, 783.42, 783.43                               | R62.50, R62.51, R62.0, R62.52                                                                                         |
| Congenital anomalies        | 740–759.9                                                           | Q00–Q99                                                                                                               |

**Table S2.** Maternal and child characteristics for participants excluded and included in the analysis.

| <b>Variable</b>          | <b>Total, No. (%)</b> | <b>Excluded, No. (%)</b> | <b>Included, No. (%)</b> | <b><i>p</i>-value<sup>†</sup></b> |
|--------------------------|-----------------------|--------------------------|--------------------------|-----------------------------------|
| Total                    | 3098 (100)            | 1619 (52.26)             | 1479 (47.74)             |                                   |
| Maternal Age             |                       |                          |                          | 0.209                             |
| <20                      | 288 (9.30)            | 140 (8.65)               | 148 (10.01)              |                                   |
| 20–34                    | 2246 (72.50)          | 1166 (72.02)             | 1080 (73.02)             |                                   |
| ≥35                      | 556 (17.95)           | 305 (18.84)              | 251 (16.97)              |                                   |
| Education level          |                       |                          |                          | 0.844                             |
| Below college degree     | 2642 (85.28)          | 1364 (84.25)             | 1278 (86.41)             |                                   |
| College degree or above  | 420 (13.56)           | 219 (13.53)              | 201 (13.59)              |                                   |
| Race ethnicity           |                       |                          |                          | <0.001                            |
| Black                    | 1965 (63.43)          | 997 (61.58)              | 968 (65.45)              |                                   |
| White                    | 227 (7.33)            | 153 (9.45)               | 74 (5.00)                |                                   |
| Hispanic                 | 682 (22.01)           | 325 (20.07)              | 357 (24.14)              |                                   |
| Others                   | 209 (6.75)            | 129 (7.97)               | 80 (5.41)                |                                   |
| Smoking during pregnancy |                       |                          |                          | 0.045                             |
| Never                    | 2496 (80.57)          | 1267 (78.26)             | 1229 (83.10)             |                                   |
| Quitter                  | 238 (7.68)            | 127 (7.84)               | 111 (7.51)               |                                   |
| Continuous               | 330 (10.65)           | 191 (11.80)              | 139 (9.40)               |                                   |
| Child's sex              |                       |                          |                          | 0.181                             |
| Female                   | 1529 (49.35)          | 780 (48.18)              | 749 (50.64)              |                                   |
| Male                     | 1567 (50.58)          | 837 (51.70)              | 730 (49.36)              |                                   |
| Delivery type            |                       |                          |                          | 0.008                             |
| C-section                | 1116 (36.02)          | 616 (38.05)              | 500 (33.81)              |                                   |
| Vaginal                  | 1967 (63.49)          | 988 (61.03)              | 979 (66.19)              |                                   |
| Season of child's birth  |                       |                          |                          | 0.697                             |
| Jan to March             | 721 (23.27)           | 388 (23.97)              | 333 (22.52)              |                                   |
| April to June            | 725 (23.40)           | 375 (23.16)              | 350 (23.66)              |                                   |
| July to September        | 848 (27.37)           | 446 (27.55)              | 402 (27.18)              |                                   |
| October to December      | 802 (25.89)           | 408 (25.20)              | 394 (26.64)              |                                   |
| Gestational age, week    |                       |                          |                          | <0.001                            |
| Mean (SD)                | 37.6(3.5)             | 37.2(3.8)                | 38.1(3.1)                |                                   |
| Birthweight, g           |                       |                          |                          | <0.001                            |
| Mean (SD)                | 2898.3(819.7)         | 2808.3(865.9)            | 2996.7(754.0)            |                                   |

<sup>†</sup> The *p*-values were obtained from chi-square test or t-test between children with and without any ADHD diagnosis.

**Table S3.** The stratified analysis results on the association between maternal HDL levels (every 20 mg/dL increase) and the risk of ADHD in offspring.

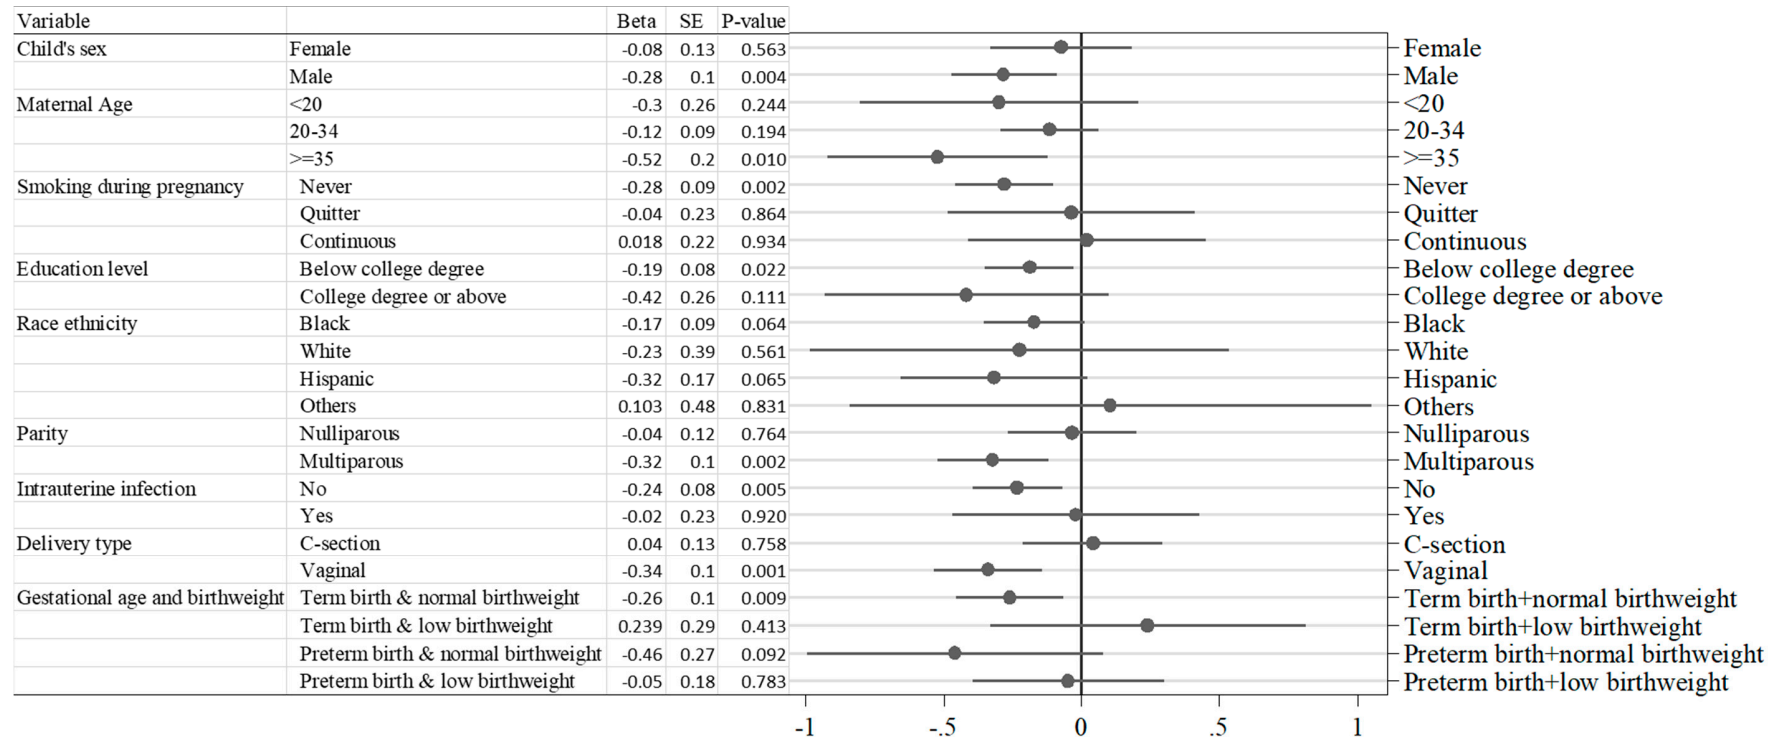

Covariates included maternal age at delivery, maternal race/ethnicity, maternal education, smoking during pregnancy, intrauterine infection, parity, baby's gender, mode of delivery, preterm birth, birthweight.

**Table S4.** The joint association of child's gender and maternal HDL levels with the risk of any specialist ADHD diagnosis.

| <b>Gender</b>                            | <b>Maternal HDL Level</b> | <b>ADHD, No. (%)</b> | <b>NT, No. (%)</b> | <b>OR</b> | <b>95% CI</b> |      | <b>p-value</b> |
|------------------------------------------|---------------------------|----------------------|--------------------|-----------|---------------|------|----------------|
| Female                                   |                           | 59 (8.16)            | 664 (91.84)        | 1.00      |               |      |                |
| Male                                     |                           | 155 (23.24)          | 512 (76.76)        | 3.26      | 2.35          | 4.53 | <0.001         |
| Maternal HDL effects within gender       |                           |                      |                    |           |               |      |                |
| Female                                   | Q4                        | 9 (4.59)             | 187 (95.41)        | 1.00      |               |      |                |
|                                          | Q3                        | 19 (9.95)            | 172 (90.05)        | 2.24      | 0.98          | 5.16 | 0.057          |
|                                          | Q2                        | 17 (10.83)           | 140 (89.17)        | 2.59      | 1.10          | 6.09 | 0.029          |
|                                          | Q1                        | 14 (7.82)            | 165 (92.18)        | 1.65      | 0.68          | 3.99 | 0.266          |
| Male                                     | Q4                        | 29 (19.86)           | 117 (80.14)        | 1.00      |               |      |                |
|                                          | Q3                        | 28 (17.50)           | 132 (82.50)        | 0.80      | 0.44          | 1.46 | 0.474          |
|                                          | Q2                        | 48 (24.24)           | 150 (75.76)        | 1.21      | 0.70          | 2.07 | 0.494          |
|                                          | Q1                        | 50 (30.67)           | 113 (69.33)        | 1.65      | 0.95          | 2.86 | 0.073          |
| Joint effects of maternal HDL and gender |                           |                      |                    |           |               |      |                |
| Female                                   | > median                  | 28 (7.24)            | 359 (92.76)        | 1.00      |               |      |                |
|                                          | ≤ median                  | 31 (9.23)            | 305 (90.77)        | 1.24      | 0.72          | 2.12 | 0.440          |
| Male                                     | > median                  | 57 (18.63)           | 249 (81.37)        | 2.87      | 1.77          | 4.67 | <0.001         |
|                                          | ≤ median                  | 98 (27.15)           | 263 (72.85)        | 4.44      | 2.81          | 7.02 | <0.001         |

NT was defined as free of any neurodevelopmental disorder diagnosis; ADHD was defined as any specialist ADHD diagnosis; covariates included maternal age at delivery, maternal race/ethnicity, maternal education, smoking during pregnancy, intrauterine infection, parity, baby's gender, mode of delivery, preterm birth, birthweight.

**Table S5.** The joint association of child's gender and maternal TG levels with the risk of any specialist ADHD diagnosis.

| Gender                                  | Maternal TG Level | ADHD, No.(%) | NT, No.(%)  | OR   | 95% CI |      | <i>p</i> -value |
|-----------------------------------------|-------------------|--------------|-------------|------|--------|------|-----------------|
| Female                                  |                   | 59 (8.16)    | 664 (91.84) | 1.00 |        |      |                 |
| Male                                    |                   | 155 (23.24)  | 512 (76.76) | 3.31 | 2.39   | 4.59 | <0.001          |
| Maternal TG effects within gender       |                   |              |             |      |        |      |                 |
| Female                                  | Q1                | 14 (8.05)    | 160 (91.95) | 1.24 | 0.55   | 2.77 | 0.605           |
|                                         | Q2                | 13 (7.26)    | 166 (92.74) | 1.00 |        |      |                 |
|                                         | Q3                | 13 (7.30)    | 165 (92.70) | 1.01 | 0.45   | 2.27 | 0.984           |
|                                         | Q4                | 19 (9.90)    | 173 (90.10) | 1.50 | 0.68   | 3.31 | 0.310           |
| Male                                    | Q1                | 45 (26.16)   | 127 (73.84) | 1.54 | 0.90   | 2.65 | 0.116           |
|                                         | Q2                | 30 (18.63)   | 131 (81.37) | 1.00 |        |      |                 |
|                                         | Q3                | 40 (24.10)   | 126 (75.90) | 1.39 | 0.80   | 2.42 | 0.242           |
|                                         | Q4                | 40 (23.81)   | 128 (76.19) | 1.40 | 0.79   | 2.49 | 0.245           |
| Joint effects of maternal TG and gender |                   |              |             |      |        |      |                 |
| Female                                  | Q2                | 13 (7.26)    | 166 (92.74) | 1.00 |        |      |                 |
|                                         | Q1, Q3, Q4        | 46 (8.46)    | 498 (91.54) | 1.17 | 0.61   | 2.24 | 0.631           |
| Male                                    | Q2                | 30 (18.63)   | 131 (81.37) | 2.87 | 1.43   | 5.76 | 0.003           |
|                                         | Q1, Q3, Q4        | 125 (24.70)  | 381 (75.30) | 4.04 | 2.20   | 7.41 | <0.001          |

NT was defined as free of any neurodevelopmental disorder diagnosis; ADHD was defined as any specialist ADHD diagnosis; covariates included maternal age at delivery, maternal race/ethnicity, maternal education, smoking during pregnancy, intrauterine infection, parity, baby's gender, mode of delivery, preterm birth, birthweight.

**Table S6.** The joint association of child's gender and maternal HDL levels with the risk of any ADHD diagnosis (last diagnosis older than six years).

| Gender                                   | Maternal HDL Level | ADHD, No.(%) | NT, No.(%)  | OR   | 95% CI |      | <i>p</i> -value |
|------------------------------------------|--------------------|--------------|-------------|------|--------|------|-----------------|
| Female                                   |                    | 51 (7.13)    | 664 (92.87) | 1.00 |        |      |                 |
| Male                                     |                    | 132 (20.50)  | 512 (79.50) | 3.22 | 2.27   | 4.57 | <0.001          |
| Maternal HDL effects within gender       |                    |              |             |      |        |      |                 |
| Female                                   | Q4                 | 8 (4.10)     | 187 (95.90) | 1.00 |        |      |                 |
|                                          | Q3                 | 17 (8.99)    | 172 (91.01) | 2.19 | 0.91   | 5.27 | 0.081           |
|                                          | Q2                 | 14 (9.09)    | 140 (90.91) | 2.30 | 0.92   | 5.76 | 0.075           |
|                                          | Q1                 | 12 (6.78)    | 165 (93.22) | 1.49 | 0.58   | 3.83 | 0.411           |
| Male                                     | Q4                 | 23 (16.43)   | 117 (83.57) | 1.00 |        |      |                 |
|                                          | Q3                 | 24 (15.38)   | 132 (84.62) | 0.85 | 0.44   | 1.61 | 0.612           |
|                                          | Q2                 | 40 (21.05)   | 150 (78.95) | 1.23 | 0.68   | 2.20 | 0.492           |
|                                          | Q1                 | 45 (28.48)   | 113 (71.52) | 1.83 | 1.02   | 3.31 | 0.043           |
| Joint effects of maternal HDL and gender |                    |              |             |      |        |      |                 |
| Female                                   | > median           | 25 (6.51)    | 359 (93.49) | 1.00 |        |      |                 |
|                                          | ≤ median           | 26 (7.85)    | 305 (92.15) | 1.14 | 0.64   | 2.03 | 0.662           |
| Male                                     | > median           | 47 (15.88)   | 249 (84.12) | 2.63 | 1.57   | 4.41 | <0.001          |
|                                          | ≤ median           | 85 (24.43)   | 263 (75.57) | 4.26 | 2.63   | 6.90 | <0.001          |

NT was defined as free of any neurodevelopmental disorder diagnosis; ADHD was defined as any ADHD diagnosis; covariates included maternal age at delivery, maternal race/ethnicity, maternal education, smoking during pregnancy, intrauterine infection, parity, baby's gender, mode of delivery, preterm birth, birthweight.

**Table S7.** The joint association of child's gender and maternal TG levels with the risk of any ADHD diagnosis (last diagnosis older than six years).

| Gender                                  | Maternal TG Level | ADHD, No.(%) | NT, No.(%)  | OR   | 95% CI |      | <i>p</i> -value |
|-----------------------------------------|-------------------|--------------|-------------|------|--------|------|-----------------|
| Female                                  |                   | 51 (7.13)    | 664 (92.87) | 1.00 |        |      |                 |
| Male                                    |                   | 132 (20.50)  | 512 (79.50) | 3.25 | 2.30   | 4.61 | <0.001          |
| Maternal TG effects within gender       |                   |              |             |      |        |      |                 |
| Female                                  | Q1                | 12 (6.98)    | 160 (93.02) | 1.16 | 0.49   | 2.74 | 0.727           |
|                                         | Q2                | 12 (6.74)    | 166 (93.26) | 1.00 |        |      |                 |
|                                         | Q3                | 11 (6.25)    | 165 (93.75) | 0.90 | 0.38   | 2.14 | 0.817           |
|                                         | Q4                | 16 (8.47)    | 173 (91.53) | 1.29 | 0.56   | 2.98 | 0.546           |
| Male                                    | Q1                | 40 (23.95)   | 127 (76.05) | 1.71 | 0.96   | 3.05 | 0.070           |
|                                         | Q2                | 24 (15.48)   | 131 (84.52) | 1.00 |        |      |                 |
|                                         | Q3                | 31 (19.75)   | 126 (80.25) | 1.32 | 0.72   | 2.43 | 0.371           |
|                                         | Q4                | 37 (22.42)   | 128 (77.58) | 1.58 | 0.85   | 2.91 | 0.146           |
| Joint effects of maternal TG and gender |                   |              |             |      |        |      |                 |
| Female                                  | Q2                | 12 (6.74)    | 166 (93.26) | 1.00 |        |      |                 |
|                                         | Q1, Q3, Q4        | 39 (7.26)    | 498 (92.74) | 1.05 | 0.53   | 2.07 | 0.892           |
| Male                                    | Q2                | 24 (15.48)   | 131 (84.52) | 2.48 | 1.18   | 5.20 | 0.016           |
|                                         | Q1, Q3, Q4        | 108 (22.09)  | 381 (77.91) | 3.68 | 1.95   | 6.93 | <0.001          |

NT was defined as free of any neurodevelopmental disorder diagnosis; ADHD was defined as any ADHD diagnosis; covariates included maternal age at delivery, maternal race/ethnicity, maternal education, smoking during pregnancy, intrauterine infection, parity, baby's gender, mode of delivery, preterm birth, birthweight.

**Table S8.** The association between maternal cholesterol and the risk of other neurodevelopmental disorders in offspring.

| Maternal cholesterol                       |                     | OtherDD, No. (%) | NT, No. (%)  | Crude OR | 95% CI |     | p-value | Adjusted OR | 95% CI |     | p-value |
|--------------------------------------------|---------------------|------------------|--------------|----------|--------|-----|---------|-------------|--------|-----|---------|
| HDL clinical cut-off                       | ≥ 50 mg/dL          | 444 (33.08)      | 898 (66.92)  | 1.00     |        |     |         | 1.00        |        |     |         |
|                                            | < 50 mg/dL          | 158 (36.24)      | 278 (63.76)  | 1.15     | 0.9    | 1.4 | 0.227   | 1.13        | 0.9    | 1.4 | 0.300   |
| HDL quartiles                              | Q4 (>73 mg/dL)      | 142 (31.84)      | 304 (68.16)  | 1.00     |        |     |         | 1.00        |        |     |         |
|                                            | Q3 (61–73 mg/dL)    | 164 (35.04)      | 304 (64.96)  | 1.15     | 0.8    | 1.5 | 0.305   | 1.06        | 0.8    | 1.4 | 0.664   |
|                                            | Q2 (50–60 mg/dL)    | 138 (32.24)      | 290 (67.76)  | 1.02     | 0.7    | 1.3 | 0.898   | 0.90        | 0.6    | 1.2 | 0.465   |
|                                            | Q1 (< 50 mg/dL)     | 158 (36.24)      | 278 (63.76)  | 1.22     | 0.9    | 1.6 | 0.168   | 1.12        | 0.8    | 1.4 | 0.461   |
| HDL binary                                 | > median (60 mg/dL) | 306 (33.48)      | 608 (66.52)  | 1.00     |        |     |         | 1.00        |        |     |         |
|                                            | ≤ median (60 mg/dL) | 296 (34.26)      | 568 (65.74)  | 1.04     | 0.8    | 1.2 | 0.728   | 0.97        | 0.7    | 1.1 | 0.764   |
| HDL linear trend (every 20 mg/dL increase) |                     | 602 (33.86)      | 1176 (66.14) | 0.95     | 0.8    | 1.0 | 0.391   | 0.99        | 0.8    | 1.1 | 0.933   |
| TG clinical cut-off                        | < 200 mg/dL         | 388 (34.28)      | 744 (65.72)  | 1.00     |        |     |         | 1.00        |        |     |         |
|                                            | ≥ 200 mg/dL         | 214 (33.13)      | 432 (66.87)  | 0.95     | 0.7    | 1.1 | 0.623   | 1.08        | 0.8    | 1.3 | 0.500   |
| TG quartiles                               | Q1 (<135 mg/dL)     | 154 (34.92)      | 287 (65.08)  | 1.00     |        |     |         | 1.00        |        |     |         |
|                                            | Q2 (135–176 mg/dL)  | 159 (34.87)      | 297 (65.13)  | 1.00     | 0.7    | 1.3 | 0.987   | 1.04        | 0.7    | 1.3 | 0.806   |
|                                            | Q3 (177–232 mg/dL)  | 154 (34.61)      | 291 (65.39)  | 0.99     | 0.7    | 1.3 | 0.922   | 1.04        | 0.7    | 1.4 | 0.766   |
|                                            | Q4 (>232 mg/dL)     | 135 (30.96)      | 301 (69.04)  | 0.84     | 0.6    | 1.1 | 0.213   | 0.96        | 0.7    | 1.3 | 0.801   |
| TG binary                                  | Q2                  | 159 (34.87)      | 297 (65.13)  | 1.00     |        |     |         | 1.00        |        |     |         |
|                                            | Q1, Q3, Q4          | 443 (33.51)      | 879 (66.49)  | 0.94     | 0.7    | 1.1 | 0.597   | 0.97        | 0.7    | 1.2 | 0.788   |
| TG linear trend (every 20 mg/dL increase)  |                     | 602 (33.86)      | 1176 (66.14) | 1.00     | 0.9    | 1.0 | 0.747   | 1.01        | 0.9    | 1.0 | 0.303   |
| LDL quartiles                              | Q1 (<96 mg/dL)      | 156 (35.62)      | 282 (64.38)  | 1.00     |        |     |         | 1.00        |        |     |         |
|                                            | Q2 (96–121 mg/dL)   | 157 (35.36)      | 287 (64.64)  | 0.99     | 0.7    | 1.3 | 0.937   | 1.00        | 0.7    | 1.3 | 0.983   |
|                                            | Q3 (122–150 mg/dL)  | 155 (33.99)      | 301 (66.01)  | 0.93     | 0.7    | 1.2 | 0.610   | 0.98        | 0.7    | 1.3 | 0.873   |
|                                            | Q4 (>150 mg/dL)     | 134 (30.45)      | 306 (69.55)  | 0.79     | 0.6    | 1.0 | 0.104   | 0.85        | 0.6    | 1.1 | 0.278   |
| LDL linear trend (every 20 mg/dL increase) |                     | 602 (33.86)      | 1176 (66.14) | 0.95     | 0.9    | 0.9 | 0.024   | 0.96        | 0.9    | 1.0 | 0.102   |
| TC quartiles                               | Q1 (<176 mg/dL)     | 150 (34.72)      | 282 (65.28)  | 1.00     |        |     |         | 1.00        |        |     |         |
|                                            | Q2 (176–214 mg/dL)  | 164 (36.36)      | 287 (63.64)  | 1.07     | 0.8    | 1.4 | 0.611   | 1.13        | 0.8    | 1.5 | 0.385   |



|                                              |             |                 |      |          |          |       |      |          |          |       |
|----------------------------------------------|-------------|-----------------|------|----------|----------|-------|------|----------|----------|-------|
| Q3 215–254<br>mg/dL)                         | 160 (35.56) | 290<br>(64.44)  | 1.04 | 0.7<br>9 | 1.3<br>7 | 0.796 | 1.11 | 0.8<br>3 | 1.4<br>8 | 0.478 |
| Q4 (>254<br>mg/dL)                           | 128 (28.76) | 317<br>(71.24)  | 0.76 | 0.5<br>7 | 1.0<br>1 | 0.058 | 0.85 | 0.6<br>2 | 1.1<br>5 | 0.282 |
| TC linear trend (every 20 mg/dL<br>increase) | 602 (33.86) | 1176<br>(66.14) | 0.97 | 0.9<br>3 | 1.0<br>0 | 0.035 | 0.98 | 0.9<br>4 | 1.0<br>1 | 0.213 |

NT was defined as without any neurodevelopmental disorder diagnosis; otherDD is defined as any neurodevelopmental disorder diagnosis other than ADHD; the multiple logistic regression model was adjusted for maternal age at delivery, maternal race/ethnicity, maternal education, smoking during pregnancy, intrauterine infection, parity, child's sex, mode of delivery, preterm birth, and birthweight.
